# Supplementary material for: Butyrate Protects against SARS-CoV-2-Induced Tissue Damage in Golden Hamsters
Source: MDPI journal article supplement (doi:10.3390/ijms241814191), 2023-09-16
Supplement: s1 [file s1]

**Table S1:** Primer sequence used for RT-qPCR.

| <b>Gene</b>   | <b>Forward primer (5'-&gt;3')</b> | <b>Reverse primer (5'-&gt;3')</b> |
|---------------|-----------------------------------|-----------------------------------|
| <i>Ifnb1</i>  | TACTGGCAGCTGGGAAGGTA              | TGCCTGCAACCATTATCCAGT             |
| <i>Ifnar1</i> | TCAGCAAGTGTCGCAAGCTA              | TGTGGCTGCAAGTTCTCGAT              |
| <i>Ifnar2</i> | AATTCGGGGTTGTCGGCTTT              | AGGTGACGTTCCCAGTGATG              |
| <i>Il6</i>    | AGACAAAGCCAGAGTCATT               | TCGGTATGCTAAGGCACAG               |
| <i>Il1b</i>   | GAGAGTGTGGACCCCAAACA              | TAAATCCTGGCCGCTGTTGT              |
| <i>Tnfa</i>   | TGAGCCATCGTGCCAATG                | AGCCCGTCTGCTGGTATCAC              |
| <i>Icam1</i>  | CCGTGAGCTCCCATGGAAAT              | TGAGGCTGAGGAGGTCTGAT              |
| <i>Vcam1</i>  | CCTTCCCTCTGAGAGCGTC               | TATGCGCCGTCAATGGACTT              |
| <i>Sele</i>   | AAGCTATGACACACCCTGCC              | ATTCTGAGCTCCAACTCGCC              |
| <i>Nos3</i>   | CACCTCACCGTAGCTGTGTT              | GTCCCTGGACCCACTAGGAT              |
| <i>Nos2</i>   | GACCATGGAGCATCCCAAGT              | AAATTCAAGGCCACCCACCT              |
| <i>Ifng</i>   | TGTTGCTCTGCCTCACTCAGG             | AAGACGAGGTCCCCTCCATTC             |
| <i>Nox2</i>   | TTGATGGACCCTTTGGCACA              | AACCACTCGAAGGCATGTGT              |
| <i>Casp8</i>  | AATGCCGGAAGTGTGTGACT              | CGTTCTTCCTCGCCTTGCTA              |
| <i>Casp3</i>  | AAGATCCCTGAACTCCATGTCC            | CTGTGCTGGATGTTCTCCAAGT            |
| <i>Casp6</i>  | AGATGCCGATTGCTTCCTGT              | TTCCAACCAGGCTCTGACAC              |
| <i>Casp7</i>  | GACCAGAGTGAACGACAGGG              | ATGGTCAACGGCCGAAGTAG              |
| <i>Bax</i>    | TTGCTACAGGGTTTCATCCAGG            | TCTCCGATTGCTGAGACA                |
| <i>Bcl2</i>   | AAATCGCCGAGAAGAAGCGA              | GTTCCACGGTTTGGCTTCAC              |
| <i>Muc2</i>   | CAGACAATGGTGGCTGGCTA              | TTGTGGATGCAGGGACACTC              |
| <i>Actg</i>   | ACAGAGAGAAGATGACGCAGATAATG        | GCCTGAATGGCCACGTACA               |
